# Supplementary material for: Efficacy of a melatonin receptor agonist and orexin receptor antagonists in preventing delirium symptoms in the olderly patients with stroke: a retrospective study
Source: PubMed Central journal article supplement (PMC11572110; doi:10.1186/s40780-024-00397-z), 2024-11-18
Supplement: 40780_2024_397_MOESM1_ESM.pdf [file 40780_2024_397_MOESM1_ESM.pdf]

Table S1. Laboratory values upon admission

| Laboratory values, Mean (SD) | Consecutive administration group<br>n=33 | Non-consecutive administration group<br>n=71 | <i>p</i> value |
|------------------------------|------------------------------------------|----------------------------------------------|----------------|
| Na (mmol/L)                  | 139.4 (2.9)<br>n=33                      | 139.5 (3.4)<br>n=71                          | 0.82           |
| K (mmol/L)                   | 4.1 (0.6)<br>n=33                        | 4.0 (0.4)<br>n=71                            | 0.25           |
| Ca (mg/dL)                   | 8.9 (0.4)<br>n=28                        | 9 (0.4)<br>n=60                              | 0.24           |
| Mg (mg/dL)                   | 2.0 (0.3)<br>n=10                        | 2.0 (0.3)<br>n=16                            | 0.82           |
| CRP (mg/dL)                  | 0.6 (2.0)<br>n=33                        | 1.1 (4.1)<br>n=71                            | 0.49           |

Comparisons between the consecutive administration group and the non-consecutive administration group were conducted using the unpaired *t*-test.

Table S2. Patients with an increase in the number of positive DST items within 7 Days

|                                                                        | Consecutive<br>administration group | Non-consecutive<br>administration group |
|------------------------------------------------------------------------|-------------------------------------|-----------------------------------------|
| Patients with an increase in<br>the number of positive DST<br>items, n | 2                                   | 15                                      |
| DST items, n                                                           |                                     |                                         |
| Abnormal sense of reality                                              | 1                                   | 1                                       |
| Decreased activity                                                     | 1                                   | 3                                       |
| Excitement                                                             | 1                                   | 6                                       |
| Mood fluctuations                                                      | 1                                   | 6                                       |
| Sleep-wake rhythms                                                     | 1                                   | 8                                       |
| Delusions                                                              | 0                                   | 0                                       |
| Hallucinations                                                         | 1                                   | 0                                       |
